# Supplementary material for: Dehydrogenation reaction of triethylamine by an electrophilic terminal phosphinidene complex
Source: Royal Society of Chemistry journal article supplement (doi:10.1039/d3dt00300k), 2023-01-01
Supplement: d3dt00300k1.pdf [file d3dt00300k1.pdf]

**Electronic Supplementary Information (ESI)**

**Dehydrogenation reaction of triethylamine by an electrophilic terminal  
phosphinidene complex**

Arif Ali Khan, Tim Kalisch, Arturo Espinosa Ferao,\* and Rainer Streubel\*

**Table of Contents**

|     |                                                                                                                                                         |    |
|-----|---------------------------------------------------------------------------------------------------------------------------------------------------------|----|
| 1   | EXPERIMENTAL PROCEDURES .....                                                                                                                           | 2  |
| 2   | NMR SPECTRA.....                                                                                                                                        | 2  |
| 2.1 | [[{(Me <sub>3</sub> Si) <sub>2</sub> HCP(H)((CH <sub>3</sub> )HCN(C <sub>2</sub> H <sub>5</sub> ) <sub>2</sub> )}W(CO) <sub>5</sub> ] ( <b>4</b> )..... | 2  |
| 2.2 | [[{(Me <sub>3</sub> Si) <sub>2</sub> HCPH <sub>2</sub> }W(CO) <sub>5</sub> ] ( <b>5</b> ).....                                                          | 4  |
| 3   | COMPUTATIONAL DETAILS .....                                                                                                                             | 6  |
| 3.1 | Computed structures.....                                                                                                                                | 7  |
| 4   | REFERENCES .....                                                                                                                                        | 18 |

## Experimental Procedures

All manipulations were carried out under an inert atmosphere of dry nitrogen using standard Schlenk techniques. Solvents were dried and degassed according to standard protocols. Tetrahydrofuran (THF), diethyl ether, petrol ether and n-pentane were dried over sodium wire/benzophenone, toluene and triethylamine over sodium and further purified by subsequent distillation. All spectra were recorded on a Bruker Avance 300 spectrometer at 25 °C. The  $^1\text{H}$  and  $^{13}\text{C}$  NMR spectra were referenced to the residual proton resonances and the  $^{13}\text{C}$  NMR signals of the deuterated solvents and  $^{31}\text{P}$  NMR spectra were referenced to 85%  $\text{H}_3\text{PO}_4$ , respectively. NMR data were recorded in  $\text{CDCl}_3$  solutions (295 K) at 50.3 MHz ( $^{13}\text{C}$ ), 81.0 MHz ( $^{31}\text{P}$ ) and 200 MHz ( $^1\text{H}$ ), using TMS and 85%  $\text{H}_3\text{PO}_4$  as standard references; J/Hz. Melting points were determined in one-side melted off capillaries using a Büchi Type S apparatus and are uncorrected. Elemental analyses were carried out on a Vario EL gas chromatograph. Mass spectrometric data were collected on a Kratos Concept 1H Spectrometer. IR spectra of all compounds were recorded on a Thermo Nicolet 380 FT-IR spectrometer with an attenuated total reflection (ATR) attachment or a Bruker Alpha Diamond ATR FTIR spectro-meter.

### 1 NMR spectra

#### 1.1 $\{(\text{Me}_3\text{Si})_2\text{HCP}(\text{H})((\text{CH}_3)\text{HCN}(\text{C}_2\text{H}_5)_2)\}\text{W}(\text{CO})_5$ (**4**)

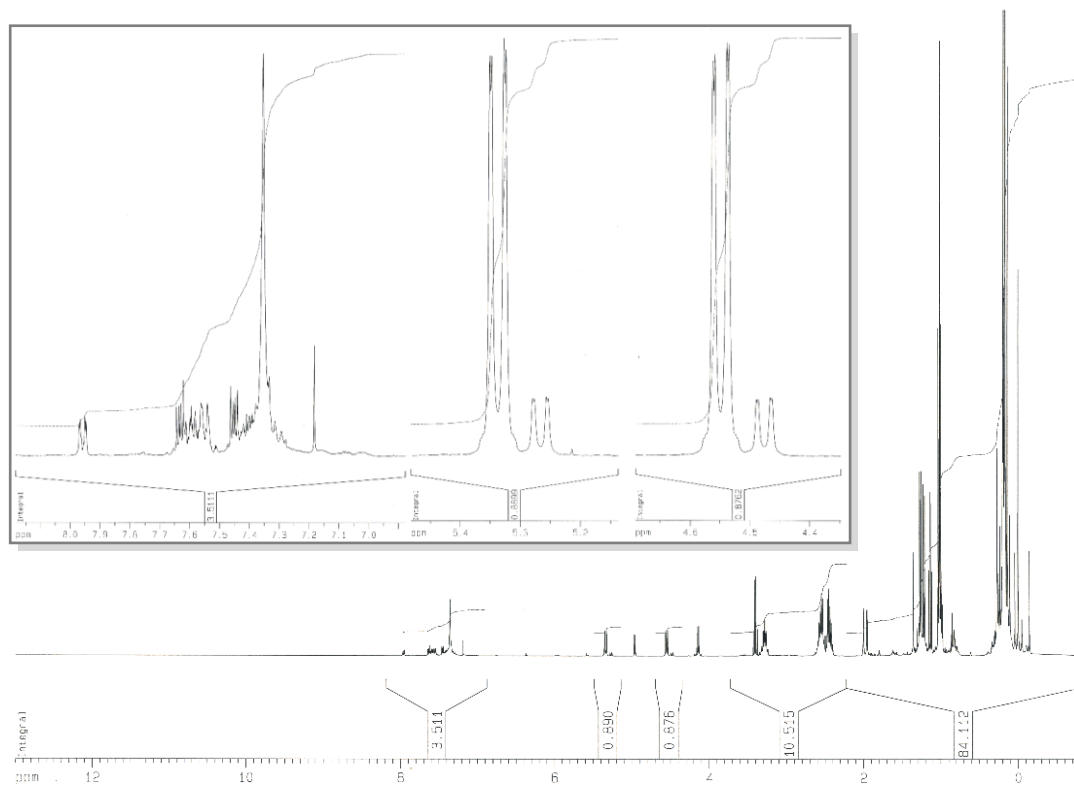

**Figure S1.**  $^1\text{H}$  NMR spectrum of **4**.

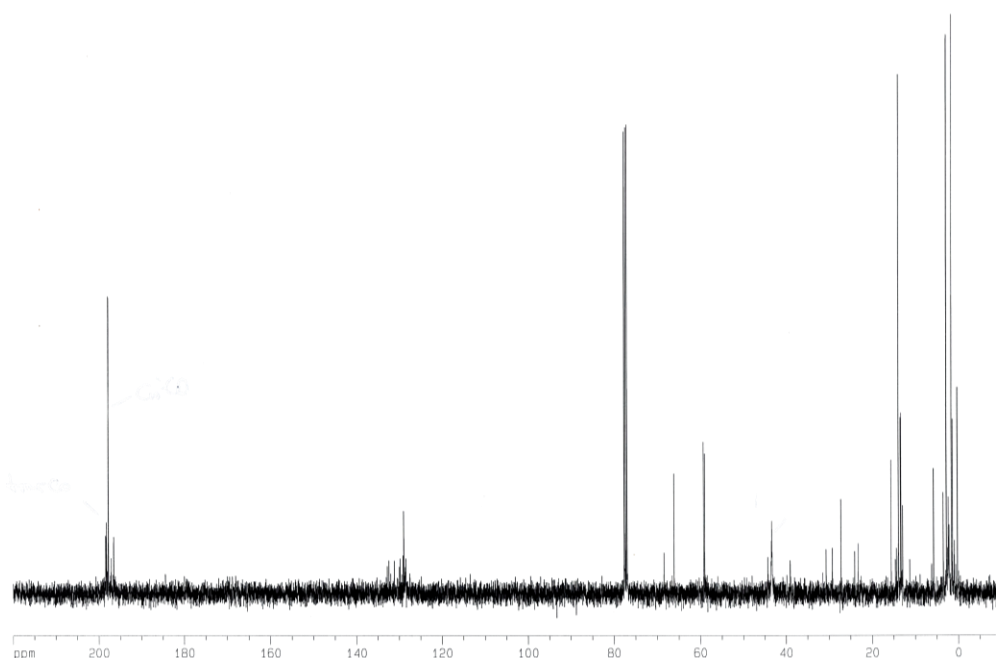

**Figure S2.**  $^{13}\text{C}\{^1\text{H}\}$  NMR spectrum of **4**.

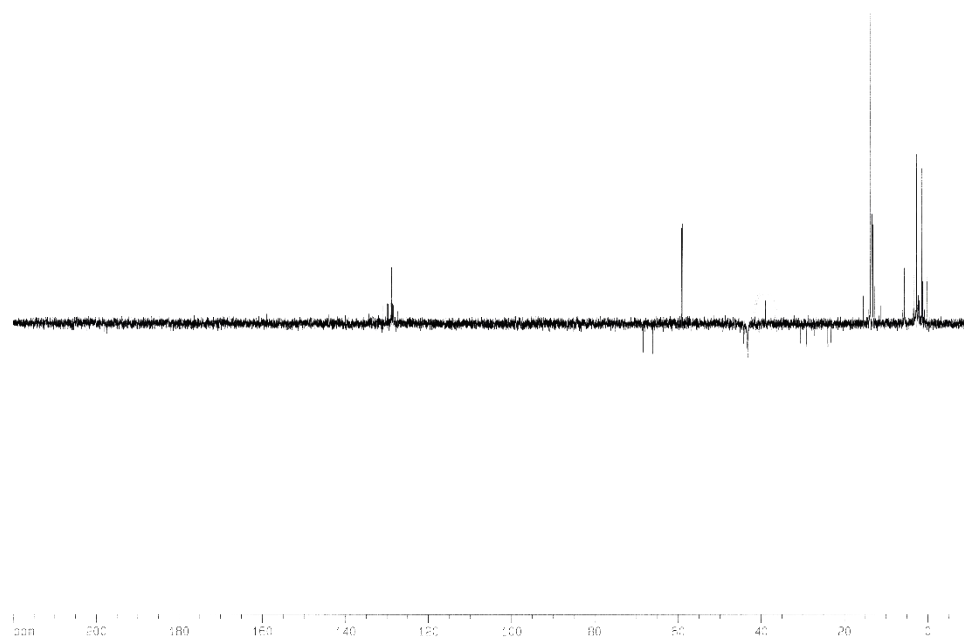

**Figure S3.**  $^{13}\text{C}$  dept135 NMR spectrum of **4**.

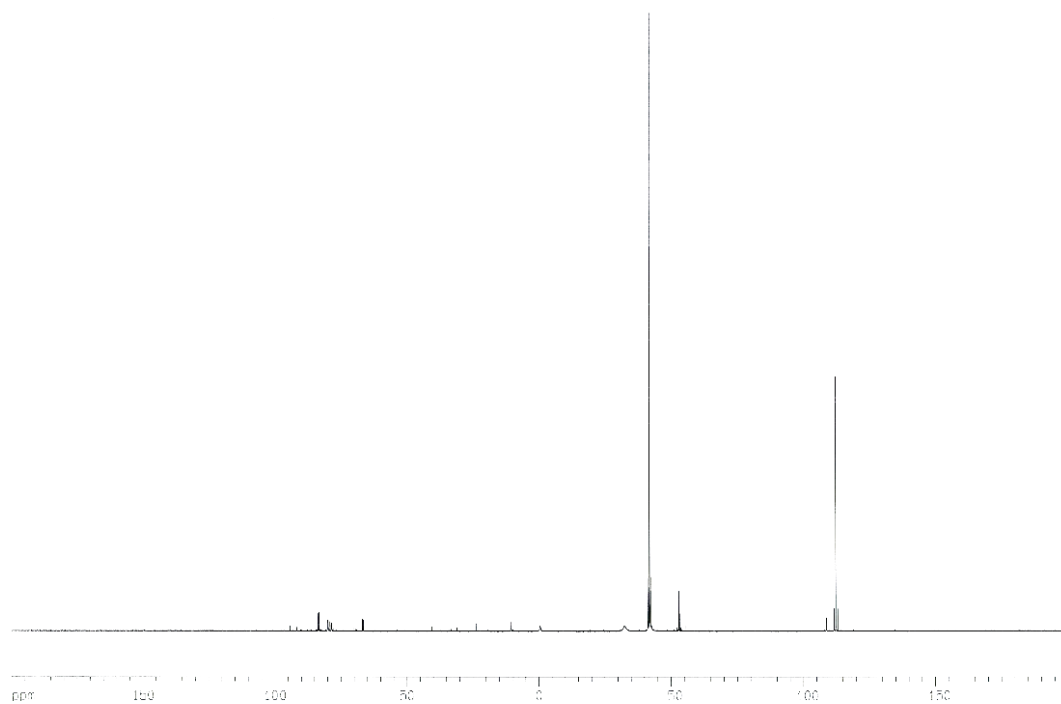

**Figure S4.**  $^{31}\text{P}\{^1\text{H}\}$  NMR spectrum of **4**.

1.2  $[\{(\text{Me}_3\text{Si})_2\text{HCPH}_2\}\text{W}(\text{CO})_5]$  (**5**)

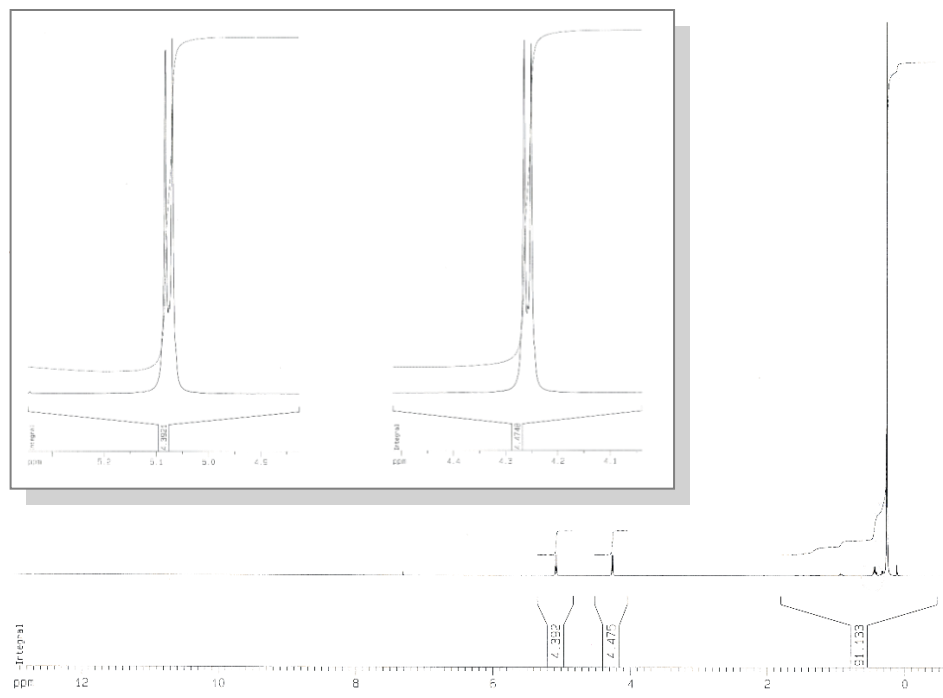

**Figure S5.**  $^1\text{H}$  NMR spectrum of **5**.

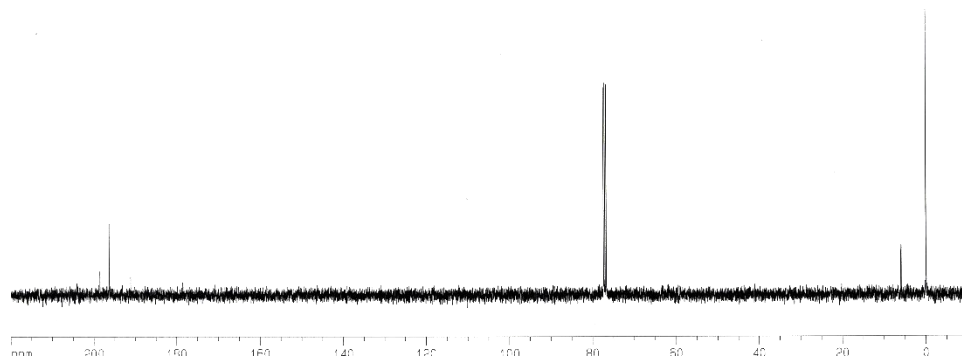

**Figure S6.**  $^{13}\text{C}\{^1\text{H}\}$  NMR spectrum of **5**.

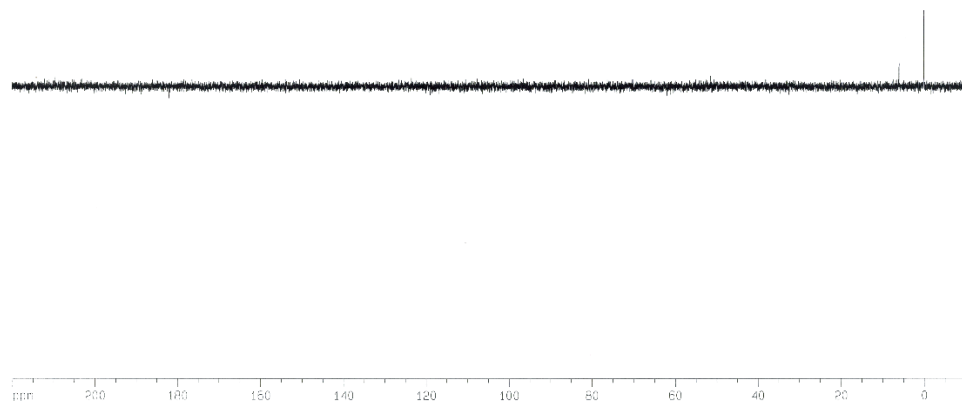

**Figure S7.**  $^{13}\text{C}$  dept135 NMR spectrum of **5**.

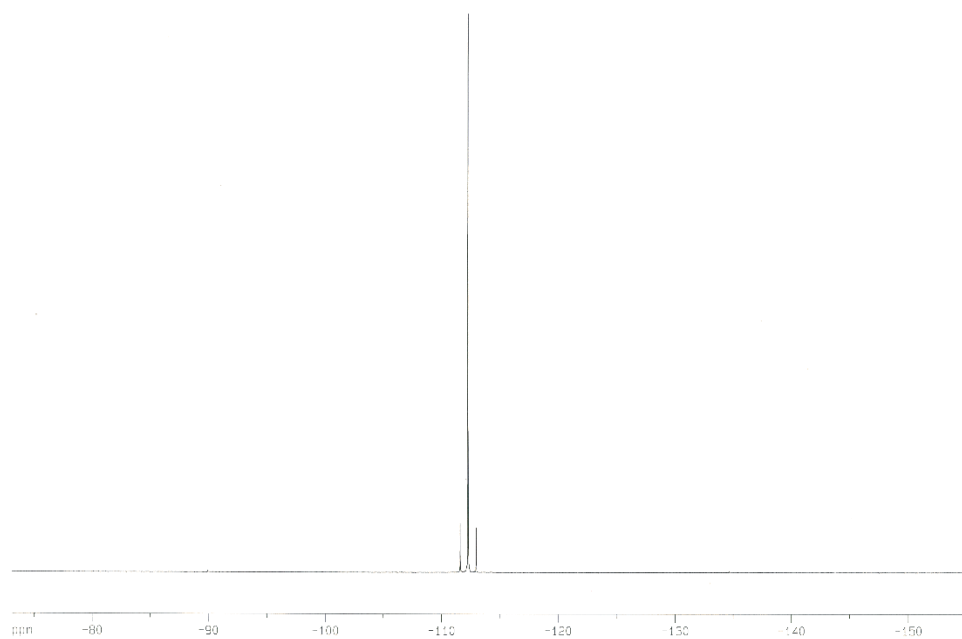

**Figure S8.**  $^{31}\text{P}\{^1\text{H}\}$  NMR spectrum of **5**.

## Computational Details

DFT calculations were performed with the ORCA electronic structure program package.<sup>1</sup> All geometry optimizations were run in redundant internal coordinates. All optimizations were performed in the gas phase with redundant internal coordinates and tight convergence criteria using the B3LYP functional<sup>2</sup> together with the def2-TZVP basis set<sup>3,4</sup> and speeded up by means of the fast and accurate "chain of spheres" RIJCOSX algorithm.<sup>5</sup> The latest Grimme's semiempirical atom-pairwise dispersion correction based on tight binding partial charges (DFT-D4) was included in all calculations.<sup>6</sup> Harmonic frequency calculations verified the nature of the computed species as minima, featuring none or only one negative eigenvalues for minima or transition states (TS), respectively. The later were checked by performing intrinsic reaction coordinate calculations.<sup>7</sup> Energy values were corrected for the Gibbs free energy correction term at the optimization level and obtained by the DLPNO method<sup>8</sup> for the "coupled cluster" level with single, double as well as triple perturbatively introduced excitations (CCSD(T)).<sup>9</sup> Solvent effects (toluene) were taken into account only for NMR calculations via the Conductor-like Polarizable Continuum Model (CPCM).<sup>10</sup> Isotropic values ( $\sigma_{\text{iso}}$ ) for the  $^{31}\text{P}$  NMR magnetic shielding tensor were computed using the Gauge Including Atomic Orbital (GIAO) method,<sup>11</sup> at the CPCM(toluene)/PBE0/IGLOIII(C,H,O,N,P)-def2TZVPPecp(W) level. The expected chemical shifts  $\delta^{\text{P}}$  were estimated through a linear equation  $\delta^{\text{P}} = 279.4 - 0.9029 \cdot \sigma_{\text{iso}}$ , which in turn was obtained from a linear regression ( $R^2 = 0.9963$ ) of twelve reference compounds (Figure S1), as reported elsewhere.<sup>12</sup>

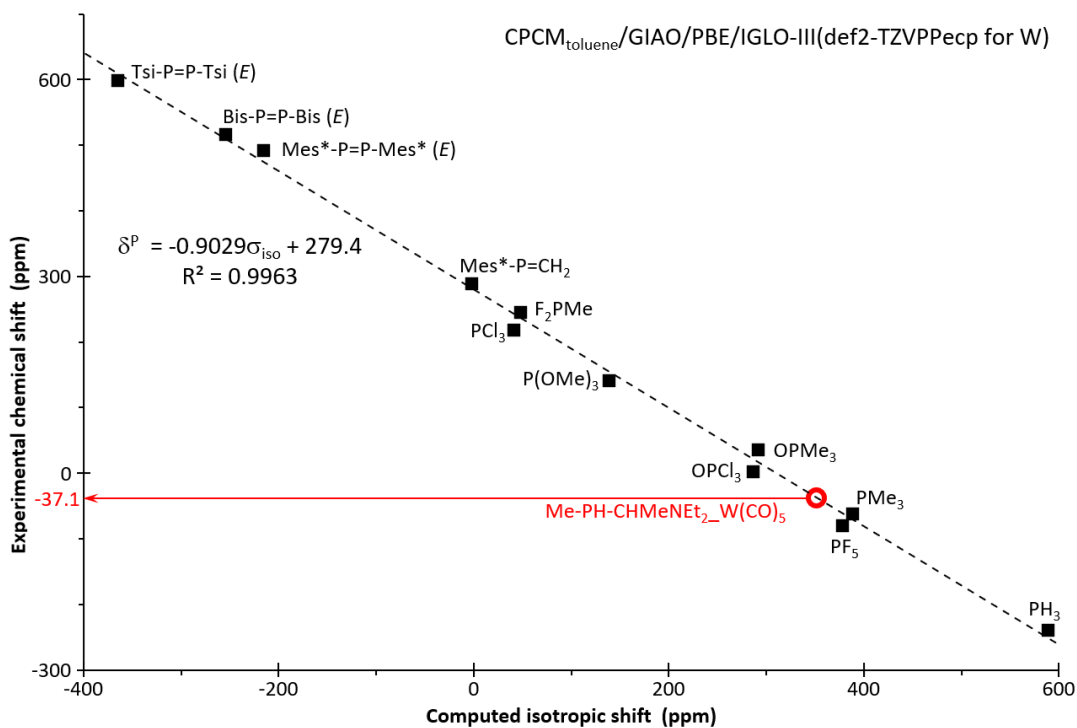

**Figure S9.** Linear regression fit of experimentally reported  $^{31}\text{P}$  chemical shift values and computed magnetic isotopic shift.

### 1.3 Computed structures.

Cartesian coordinates (in Å), and G correction (G-E) (in hartrees) for minima and transition states were computed at the optimization B3LYP-D3/def2-TZVP(ecp) level. Electronic energies (in hartrees) are quoted at the DLPNO-CCSD(T)/def2-TZVPP(ecp) level. Imaginary frequencies are obtained upon frequency calculation (at the optimization level).

**1'** E= -1337.46339422434 au  
ZPE = 0.18043622 au  
G<sub>corr</sub> = 0.12848859 au

|                             |                              |
|-----------------------------|------------------------------|
| P-0.1698240.075562-0.262336 | O-0.5974012.828973-3.117536  |
| C0.074258-0.322882 1.500860 | C-1.8906600.064029-0.611014  |
| H0.889016-1.043610 1.588288 | N-1.399238-1.075333-0.890431 |
| H0.3632940.585993 2.031701  | C-3.1710430.724663-0.699784  |
| H-0.831302-0.7356831.942182 | C-3.2834712.062795-0.316170  |
| W1.6560491.096633-1.626193  | C-4.2889130.033445-1.182934  |
| C3.1546001.959167 -2.698319 | C-4.5068392.709934-0.416054  |
| O4.0037972.452729 -3.291695 | H-2.4093372.585271 0.050874  |
| C1.8569802.561857 -0.191351 | C-5.5070500.684853-1.279672  |
| O1.9635303.374943 0.608942  | H-4.185904-1.002438-1.478749 |
| C3.010935-0.088627-0.618847 | C-5.6160502.021739-0.897700  |
| O3.749640-0.753602-0.050567 | H-4.5957563.747533-0.122717  |
| C1.423606-0.390600-3.053588 | H-6.3740440.156583-1.654366  |
| O1.290147-1.211063-3.836881 | H-6.5699292.527131-0.978082  |
| C0.2214912.223059 -2.596684 |                              |

**TS(1'→2')** E= -1337.42087296224 au  
ZPE = 0.17810074 au  
G<sub>corr</sub> = 0.12750991 au  
v = -209.58 cm<sup>-1</sup>

|                             |                              |
|-----------------------------|------------------------------|
| P0.2034200.608116 0.620471  | O-1.2760522.204518-2.671725  |
| C0.879422-0.942387 1.354936 | C-2.486756-0.517869-0.784169 |
| H1.392379-1.595537 0.651451 | N-1.643458-1.299924-0.689528 |
| H1.604397-0.615042 2.111908 | C-3.4994330.480675-0.891956  |
| H0.093722-1.493746 1.871192 | C-3.5222511.532037 0.030022  |
| W1.4933181.303277-1.311667  | C-4.4402090.419047-1.924041  |
| C2.5969431.915410 -2.972986 | C-4.4905402.516695-0.086758  |
| O3.2199462.221776 -3.880114 | H-2.7739501.569545 0.810362  |
| C1.6089493.208080 -0.502290 | C-5.4029851.410441-2.028155  |
| O1.6541884.258186 -0.054511 | H-4.405151-0.396329-2.633378 |
| C3.2099220.700944 -0.321502 | C-5.4294842.456819-1.111581  |
| O4.1317300.350181 0.255166  | H-4.5107543.334536 0.621203  |
| C1.333697-0.624768-2.075111 | H-6.1318281.368463-2.826587  |
| O1.253607-1.692030-2.465723 | H-6.1816003.230132-1.199023  |
| C-0.2844391.880739-2.204627 |                              |

**2'** E= -1013.52405102709 au  
ZPE = 0.07757558 au  
G<sub>corr</sub> = 0.03339619 au

|                             |                             |
|-----------------------------|-----------------------------|
| P-0.0368800.031532-0.384646 | C-0.447725-0.0730611.423349 |
|-----------------------------|-----------------------------|

H0.437110-0.107141 2.058388  
H-1.0033790.837195 1.655700  
H-1.092063-0.9275741.632671  
N0.854721-1.464761-0.451124  
C1.433989-2.442858-0.669950  
W1.8371071.790685-0.788830  
C3.2779863.184272 -1.067553  
O4.1050273.969053 -1.213968  
C0.8907592.997998 0.598596  
O0.3569633.647138 1.376559  
C2.8791030.866135 0.721212  
O3.4222250.298886 1.558183  
C2.7055390.502169 -2.122309  
O3.171341-0.272481-2.835317

C0.6872412.602435 -2.305420  
O0.0479493.041521 -3.146816  
C2.156928-3.621063-0.941577  
C3.187081-3.596560-1.896258  
C1.846903-4.806118-0.254905  
C3.890372-4.760152-2.157237  
H3.418359-2.675672-2.412293  
C2.571346-5.953978-0.523847  
H1.050490-4.812019 0.476383  
C3.589099-5.934840-1.473885  
H4.682719-4.747939-2.893557  
H2.339484-6.868208 0.005857  
H4.148993-6.837287-1.680762

PhCN E= -323.901541250721 au  
ZPE = 0.09900529 au  
G<sub>corr</sub> = 0.06978108 au

N0.895108-2.021448-0.010605  
C1.535616-2.906639-0.377215  
C2.329354-4.004830-0.832278  
C3.015470-3.913329-2.047649  
C2.418063-5.169372-0.062619  
C3.782750-4.981872-2.485630  
H2.940425-3.008645-2.635191

C3.188249-6.231518-0.510934  
H1.884459-5.230215 0.875938  
C3.869785-6.140184-1.720264  
H4.313077-4.910816-3.426054  
H3.256901-7.132443 0.084398  
H4.468717-6.972491-2.066586

TS(2'+PhCN→6') E= -1337.43127406355 au  
ZPE = 0.17783013 au  
G<sub>corr</sub> = 0.12630376 au  
ν = -28.05 cm<sup>-1</sup>

P0.3216810.568262 0.638976  
C0.985643-1.008710 1.328229  
H1.426168-1.677319 0.590772  
H1.773029-0.709442 2.032413  
H0.217616-1.533344 1.896078  
W1.5955311.268702-1.314941  
C2.6829531.887117 -2.978522  
O3.2957312.197820 -3.892030  
C1.7266623.163199 -0.487031  
O1.7770924.208138 -0.026698  
C3.3199540.650578 -0.349242  
O4.2461400.289491 0.214665  
C1.398082-0.654626-2.071849  
O1.285409-1.724733-2.449821  
C-0.1954051.851084-2.172986

O-1.2017722.169680-2.613349  
C-2.494182-0.333499-0.728694  
N-1.583361-1.025389-0.576372  
C-3.5735730.584464-0.873160  
C-3.6938061.627569 0.051570  
C-4.4767310.463539-1.932875  
C-4.7226642.544909-0.090172  
H-2.9750381.710220 0.855775  
C-5.5012901.388029-2.061290  
H-4.365304-0.343369-2.643932  
C-5.6248222.426055-1.142924  
H-4.8194743.355696 0.619513  
H-6.2024591.301108-2.880553  
H-6.4250573.146757-1.250272

6' E= -1337.44554676438 au  
ZPE = 0.18043627 au  
G<sub>corr</sub> = 0.12640932 au

P-0.0368800.031532-0.384646  
C-0.447725-0.0730611.423349

H0.437110-0.107141 2.058388  
H-1.0033790.837195 1.655700



H-1.092063-0.9275741.632671  
N0.854721-1.464761-0.451124  
C1.433989-2.442858-0.669950  
W1.8371071.790685-0.788830  
C3.2779863.184272 -1.067553  
O4.1050273.969053 -1.213968  
C0.8907592.997998 0.598596  
O0.3569633.647138 1.376559  
C2.8791030.866135 0.721212  
O3.4222250.298886 1.558183  
C2.7055390.502169 -2.122309  
O3.171341-0.272481-2.835317  
C0.6872412.602435 -2.305420

O0.0479493.041521 -3.146816  
C2.156928-3.621063-0.941577  
C3.187081-3.596560-1.896258  
C1.846903-4.806118-0.254905  
C3.890372-4.760152-2.157237  
H3.418359-2.675672-2.412293  
C2.571346-5.953978-0.523847  
H1.050490-4.812019 0.476383  
C3.589099-5.934840-1.473885  
H4.682719-4.747939-2.893557  
H2.339484-6.868208 0.005857  
H4.148993-6.837287-1.680762

NEt<sub>3</sub> E= -291.876399292323 au  
ZPE = 0.20459928 au  
G<sub>corr</sub> = 0.17166695 au

N-0.2908631.171897-2.017631  
C0.3845980.189171 -2.832298  
H1.4569150.286833 -2.637728  
H0.100487-0.811200-2.480267  
C0.1450630.241510 -4.348991  
H0.738361-0.528746-4.849498  
H-0.9036140.055584-4.587357  
H0.4191601.210257 -4.767838  
C0.3985542.393799 -1.675827  
H-0.2083002.910065-0.925669  
H1.3427922.135501 -1.178874

C0.7171473.369546 -2.818867  
H1.1908004.271699 -2.421881  
H1.4084162.922341 -3.535249  
H-0.1827493.665006-3.359156  
C-1.7310561.130039-1.918065  
H-2.0362770.088335-2.055495  
H-2.0188961.399181-0.893271  
C-2.5323872.017827-2.882367  
H-3.6043991.855664-2.739594  
H-2.3326653.075195-2.700504  
H-2.2898931.804214-3.923830

2'-NEt<sub>3</sub> E= -1305.17102950181 au  
ZPE = 0.28252926 au  
G<sub>corr</sub> = 0.22589466 au

P-1.328235-0.3167050.474042  
C0.139983-1.410942 0.136559  
H1.101254-0.899232 0.126739  
H0.158729-2.133465 0.958880  
H0.008322-1.978727-0.786218  
W-0.6381611.4733102.111959  
C-0.1047692.876045 3.507570  
O0.2199383.659926 4.279341  
C0.4322970.013043 3.112375  
O1.017487-0.814439 3.643808  
C1.0327611.855116 0.983962  
O1.9708602.027141 0.343429  
C-1.7761992.830666 1.067559  
O-2.4319563.562340 0.472932  
C-2.3355700.987155 3.204429  
O-3.2715400.717662 3.802419  
N-0.1669201.718687-2.522492  
C1.1665061.158192 -2.743140  
H1.8971811.936045 -2.525375

H1.3475860.361360 -2.017086  
C1.3618250.633442 -4.161921  
H2.3624330.211449 -4.274907  
H0.640196-0.151704-4.395993  
H1.2388401.432867 -4.893311  
C-0.2445983.141414-2.210715  
H-1.2435763.366233-1.850360  
H0.4448403.372104 -1.392472  
C0.0750324.017813 -3.417544  
H0.0139165.071212 -3.138665  
H1.0826323.831358 -3.792709  
H-0.6304983.831938-4.228708  
C-1.1766300.836306-2.197968  
H-0.984182-0.140178-2.641734  
H-1.1385230.525782-0.999579  
C-2.6164701.266708-2.382698  
H-3.2708000.446027-2.092267  
H-2.8764772.127593-1.771074  
H-2.7973121.513729-3.430751

**TS(2'·NEt3→3')** E= -1305.17368210578 au  
ZPE = 0.28366429 au  
G<sub>corr</sub> = 0.22850529 au  
v = -101.77 cm<sup>-1</sup>

|                             |                              |
|-----------------------------|------------------------------|
| P-0.560377-0.3740070.856901 | H0.710104-0.568944-2.943882  |
| C1.204784-0.549808 0.370080 | C0.3648270.541030 -4.741107  |
| H1.2547140.032401 -0.561427 | H1.053575-0.071391-5.328788  |
| H1.936467-0.149512 1.070047 | H-0.6398650.145901-4.899301  |
| H1.441554-1.584525 0.117737 | H0.3936681.558002 -5.131838  |
| W-0.8394671.3462622.540092  | C0.4345102.608118 -2.005795  |
| C-1.1229212.636994 4.157137 | H-0.2449583.011560-1.250521  |
| O-1.2516803.323804 5.060039 | H1.4144482.531538 -1.519872  |
| C0.4358320.231999 3.741454  | C0.5581993.612291 -3.160186  |
| O1.157487-0.379231 4.380175 | H0.8783114.583116 -2.773624  |
| C0.8185472.342254 1.809628  | H1.3053713.287098 -3.885883  |
| O1.7330192.865321 1.367511  | H-0.3862313.749480-3.686379  |
| C-2.0678002.503521 1.316902 | C-1.4492991.001317-2.238189  |
| O-2.7330983.132607 0.636188 | H-1.591949-0.057845-2.466153 |
| C-2.5212880.279003 3.112612 | H-1.7648191.124799-1.194964  |
| O-3.454759-0.3109303.401947 | C-2.3912511.844137-3.107686  |
| N-0.0261551.268599-2.320751 | H-3.4201921.500688-2.975130  |
| C0.7534570.481888 -3.257585 | H-2.3582082.895149-2.817586  |
| H1.7974710.789317 -3.146923 | H-2.1418291.775267-4.166567  |

**3'** E= 1305.21206194427 au  
ZPE = 0.28997806 au  
G<sub>corr</sub> = 0.23663275 au

|                             |                              |
|-----------------------------|------------------------------|
| P-0.0489310.033428-0.063148 | H0.340381-0.810017-2.479160  |
| C1.804553-0.039745-0.024822 | C-0.0010110.325267-4.260463  |
| H2.3150320.921862 0.052414  | H0.630535-0.340968-4.851299  |
| H2.026501-0.592602 0.891141 | H-1.028884-0.011341-4.387256 |
| H2.224694-0.611624-0.852426 | H0.0923091.324713 -4.676448  |
| W-0.7811411.4780581.978395  | C0.3391262.432300 -1.637164  |
| C-1.3193832.380446 3.715317 | H-0.3590102.999933-1.031347  |
| O-1.6113362.894360 4.700932 | H1.2424912.313526 -1.046503  |
| C0.4229610.207569 3.075816  | C0.6987003.200026 -2.902976  |
| O1.095366-0.479969 3.698377 | H1.1025294.164523 -2.589363  |
| C0.8302502.709153 1.677390  | H1.4755472.700038 -3.480604  |
| O1.7440063.370311 1.455477  | H-0.1512553.392581-3.552156  |
| C-1.9908002.794655 0.974042 | C-1.7447071.044511-1.960337  |
| O-2.6662903.544344 0.420059 | H-1.9968280.038975-2.291083  |
| C-2.3422550.128736 2.091489 | H-2.1634771.158889-0.963019  |
| O-3.194227-0.6354362.118115 | C-2.3654172.097257-2.865485  |
| N-0.2480491.056346-1.780130 | H-3.4434591.927100-2.870029  |
| C0.4596070.221182 -2.812799 | H-2.2058583.104236-2.483667  |
| H1.5162770.467034 -2.734364 | H-2.0183502.047609-3.894605  |

**TS(3'→7')** E= -1305.12683280014 au  
ZPE = 0.28283136 au  
G<sub>corr</sub> = 0.22941848 au  
v = - 770.51 cm<sup>-1</sup>

P0.2025730.368084 -0.161475  
C2.0318930.353616 -0.112394  
H2.4622041.348871 -0.015490  
H2.287398-0.199047 0.794119  
H2.448995-0.162132-0.973704  
W-0.7658431.3564691.985911  
C-1.4345532.028345 3.786076  
O-1.7970272.412565 4.803677  
C0.213529-0.192351 2.949389  
O0.764957-1.040495 3.484500  
C0.9242022.526127 2.088004  
O1.8648653.181606 2.094598  
C-1.7252932.926164 1.069327  
O-2.2487403.809996 0.556227  
C-2.4474500.184799 1.715855  
O-3.380975-0.4520461.532779  
N-0.1833631.220380-1.795267  
C0.4411220.188175 -2.733763  
H1.5031820.420299 -2.765935

H0.084983-0.769517-1.133603  
C-0.1335580.075584-4.123521  
H0.466578-0.674756-4.643219  
H-1.159975-0.297834-4.137951  
H-0.1069380.983459-4.746179  
C0.3527612.636828 -1.814988  
H-0.3531103.268591-1.279053  
H1.2747032.627800 -1.237501  
C0.6533443.199876 -3.192774  
H1.0924774.191089 -3.064500  
H1.3742172.577232 -3.719757  
H-0.2332283.303990-3.811926  
C-1.6902221.159381-1.862729  
H-1.9215820.110322-2.039260  
H-2.0619551.419502-0.874746  
C-2.3771232.050739-2.882754  
H-3.4481571.850158-2.819892  
H-2.2361313.107090-2.656634  
H-2.0585601.858307-3.903131

7' E= -1305.13658421199 au  
ZPE = 0.28430565 au  
G<sub>corr</sub> = 0.23033848 au

P0.0907740.360006 -0.155322  
C1.856012-0.056447-0.150967  
H2.4624920.832317 0.019122  
H2.008346-0.735393 0.689655  
H2.115581-0.552155-1.083499  
W-0.7458281.4606031.958569  
C-1.3565132.208665 3.756233  
O-1.6941872.618960 4.770562  
C0.4707880.130718 2.968099  
O1.153454-0.595954 3.529472  
C0.8324802.775474 1.817659  
O1.7213173.488264 1.692831  
C-1.9508112.838345 1.013365  
O-2.6111783.622038 0.498306  
C-2.2795180.076850 1.929430  
O-3.113356-0.7040411.868664  
N-0.1740101.148462-1.835076  
C0.5289400.245031 -2.811685  
H1.5699050.568118 -2.808564

H-0.474009-0.861669-0.556368  
C-0.0212570.225243-4.219272  
H0.640024-0.427353-4.793706  
H-1.014334-0.226419-4.294264  
H-0.0644751.183040-4.769316  
C0.3438392.584200 -1.702907  
H-0.3824853.158524-1.131459  
H1.2503782.519330 -1.102009  
C0.6871883.268323 -3.011712  
H1.1559404.225794 -2.776734  
H1.3953632.673040 -3.584522  
H-0.1836063.463632-3.630574  
C-1.6787751.085303-1.993797  
H-1.8767860.061969-2.304073  
H-2.1117651.225400-1.003452  
C-2.3224502.083956-2.937619  
H-3.3922711.867956-2.957326  
H-2.2094263.108816-2.585912  
H-1.9455812.008322-3.953519

TS(7'→8') E= -1305.1349845068 au  
ZPE = 0.28394230 au  
G<sub>corr</sub> = 0.23073652 au  
ν = -99.35 cm<sup>-1</sup>

P0.0795000.367757 -0.136764  
C1.839197-0.066857-0.142728  
H2.4532420.804547 0.081614  
H1.982980-0.798806 0.653530  
H2.093545-0.512014-1.103440

W-0.7485921.4627441.978269  
C-1.3490872.208235 3.780466  
O-1.6799472.615481 4.798352  
C0.4797470.128971 2.969434  
O1.169994-0.603598 3.513489

C0.8261992.781155 1.828530  
O1.7127793.495892 1.698009  
C-1.9615052.835485 1.035140  
O-2.6257943.615561 0.519197  
C-2.2799260.076452 1.957707  
O-3.112497-0.7062491.901661  
N-0.1641101.156324-1.855985  
C0.5447340.281605 -2.822869  
H1.5815530.612484 -2.834011  
H-0.496784-0.846243-0.547779  
C-0.0205250.192112-4.219728  
H0.648902-0.461964-4.782406  
H-1.003356-0.284557-4.267609  
H-0.0940031.131623-4.798650

C0.3536162.587784 -1.706458  
H-0.3681293.150562-1.117565  
H1.2673082.513750 -1.117374  
C0.6803343.291777 -3.009514  
H1.1491664.247475 -2.767751  
H1.3826902.705979 -3.599174  
H-0.1977593.492597-3.616099  
C-1.6675041.096538-2.013096  
H-1.8729260.070607-2.308891  
H-2.0975471.250722-1.023556  
C-2.3113772.084552-2.968327  
H-3.3800671.863168-2.991832  
H-2.2048343.112358-2.623584  
H-1.9290192.003261-3.981894

**8'** E= -1305.17355871244 au  
ZPE = 0.28222808 au  
G<sub>corr</sub> = 0.22544529 au

P-0.179195-0.668731-0.007954  
C1.686583-0.821709-0.032660  
H2.1112140.067734 -0.506117  
H2.129012-0.893828 0.960736  
H1.993875-1.695062-0.611955  
W-0.7934621.1172661.857698  
C-1.1372792.263563 3.480570  
O-1.3188102.899840 4.423518  
C0.333214-0.163377 3.044707  
O0.976188-0.853088 3.692404  
C0.8923312.117316 1.300454  
O1.8302402.664669 0.905888  
C-1.8721992.487116 0.808256  
O-2.4583163.334864 0.275752  
C-2.495215-0.0354992.096921  
O-3.433299-0.6898882.165123  
N-0.1722851.862965-2.548287  
C0.7238681.049392 -2.993727  
H1.7416001.423596 -2.960837

H-0.449904-1.9134700.614987  
C0.485210-0.343323-3.364266  
H1.382885-0.806384-3.763207  
H0.174745-0.843925-2.404033  
H-0.345391-0.475548-4.057364  
C0.2389743.201722 -2.054411  
H-0.5530973.548911-1.397377  
H1.1265513.060710 -1.441866  
C0.4974374.188136 -3.183513  
H0.8066335.142966 -2.757207  
H1.2968143.838042 -3.839004  
H-0.3938164.356514-3.786633  
C-1.6049531.520056-2.442593  
H-1.7392480.516102-2.827860  
H-1.8241341.480866-1.376730  
C-2.5091382.512594-3.157105  
H-3.5381542.167030-3.057220  
H-2.4592543.505780-2.713454  
H-2.2742282.581531-4.220583

**TS(2'·NEt<sub>3</sub>→8')** E= -1305.16876879688 au  
ZPE = 0.28109099 au  
G<sub>corr</sub> = 0.22372198 au  
ν = - 422.92 cm<sup>-1</sup>

P-1.354772-0.3573610.444072  
C0.129204-1.448048 0.131331  
H1.079238-0.916496 0.082788  
H0.183867-2.138040 0.977346  
H-0.004574-2.052110-0.768661  
W-0.6390601.4755142.104113  
C-0.0890332.878646 3.472472  
O0.2467303.671269 4.234204  
C0.4192440.007664 3.107066  
O0.999255-0.822331 3.641815

C1.0176731.851669 0.967584  
O1.9515672.036542 0.318243  
C-1.7648982.816966 1.044334  
O-2.4136023.542685 0.427854  
C-2.3315530.998075 3.209404  
O-3.2644130.733468 3.815377  
N-0.1496371.706247-2.448969  
C1.1826571.136848 -2.694191  
H1.9166021.886616 -2.405988  
H1.3240370.291348 -2.019869

C1.3856030.707036 -4.142703  
H2.3837560.284111 -4.267775  
H0.661375-0.056084-4.433930  
H1.2820391.550524 -4.825212  
C-0.2299533.147066-2.204546  
H-1.2144173.379245-1.813093  
H0.4900453.398131 -1.423339  
C0.0445493.969489 -3.458997  
H-0.0437235.031213-3.224263

H1.0506553.796763 -3.843004  
H-0.6702103.731085-4.248085  
C-1.1765260.865899-2.261546  
H-0.980294-0.131733-2.644244  
H-1.2228730.414026-0.892441  
C-2.6065711.316380-2.372864  
H-3.2605590.485219-2.117215  
H-2.8404522.143149-1.707304  
H-2.8107781.626579-3.401448

**TS(8'→4')**

E= -1305.17589101063 au  
ZPE = 0.28307331 au  
G<sub>corr</sub> = 0.22734591 au  
v = -143.74 cm<sup>-1</sup>

P-0.149277-0.4901370.004512  
C1.725848-0.606633-0.022336  
H2.1391880.343928 -0.369224  
H2.162456-0.803784 0.956926  
H2.056881-1.391878-0.707217  
W-0.7875551.2313641.934731  
C-1.1922472.379472 3.542970  
O-1.4085303.020723 4.476079  
C0.402261-0.035228 3.075697  
O1.077096-0.739286 3.674405  
C0.8527862.316548 1.404505  
O1.7719922.911905 1.033350  
C-1.9363092.455638 0.795132  
O-2.5793193.178908 0.153155  
C-2.4373780.013484 2.210914  
O-3.351860-0.6706192.308432  
N-0.2168451.731198-2.576795  
C0.6563010.899979 -3.005013  
H1.6883791.203342 -2.861873

H-0.380849-1.7453600.624332  
C0.389172-0.427422-3.592617  
H1.293110-0.832065-4.040748  
H0.071680-1.070556-2.756749  
H-0.411827-0.409306-4.331264  
C0.2354302.999100 -1.943269  
H-0.5617873.318881-1.280797  
H1.0952702.759879 -1.323269  
C0.5751104.069955 -2.967838  
H0.9052314.964976 -2.439831  
H1.3856163.748181 -3.624409  
H-0.2844424.334230-3.582236  
C-1.6683501.452272-2.569899  
H-1.8282070.505706-3.073465  
H-1.9215381.301813-1.521482  
C-2.4981112.559598-3.197550  
H-3.5437222.253407-3.166881  
H-2.4222813.492777-2.642789  
H-2.2231742.732278-4.239275

**4'**

E= -1305.24074248088 au  
ZPE = 0.28522463 au  
G<sub>corr</sub> = 0.23056204 au

P0.0449510.022115 -0.362889  
C1.384718-1.223701-0.181503  
H2.329730-0.706404-0.011278  
H1.176148-1.838282 0.693130  
H1.476503-1.866948-1.053884  
W-0.4364141.3160261.784078  
C-0.7771612.290484 3.531335  
O-0.9698272.847250 4.515482  
C0.8245000.045128 2.809624  
O1.510450-0.650372 3.407303  
C1.1703972.528095 1.341674  
O2.0764563.177760 1.075249  
C-1.7740852.622168 0.915695  
O-2.5497713.356757 0.502263  
C-2.0114900.018683 2.098532

O-2.879680-0.7138612.237031  
N-0.5359861.878053-2.400535  
C0.4503430.902851 -1.992900  
H1.3674651.450877 -1.763050  
H-1.002418-0.815564-0.801435  
C0.760923-0.088290-3.117393  
H1.629781-0.704441-2.890135  
H-0.081074-0.753524-3.316852  
H0.9676390.475939 -4.027176  
C-0.2962053.249131-1.958804  
H-1.2456823.782018-1.968570  
H0.0501073.275739 -0.921525  
C0.7063113.978497 -2.845150  
H0.8745644.993044 -2.476986  
H1.6718393.467789 -2.855806

H0.3426234.031932 -3.872302  
C-1.9217261.433985-2.485996  
H-1.9129650.366067-2.708340  
H-2.4540491.546439-1.530929

C-2.7033532.145559-3.584160  
H-3.7207271.752442-3.635833  
H-2.7768103.217817-3.398543  
H-2.2210852.000907-4.552034

NMe<sub>3</sub> E= -174.163028734229 au  
ZPE = 0.11974666 au  
G<sub>corr</sub> = 0.09346260 au

N0.1341760.903706 -1.927265  
C0.9277350.021963 -2.762691  
H0.8979590.303867 -3.831468  
H1.9693910.041185 -2.437726  
H0.561809-1.002306-2.674027  
C0.6394622.263392 -1.954741  
H0.0583512.888846 -1.274891

H1.6801742.278590 -1.626493  
H0.5923192.717813 -2.961673  
C-1.2732130.846871-2.275150  
H-1.635660-0.178754-2.187294  
H-1.8496341.472219-1.591247  
H-1.4737721.192337-3.306171

**TS(8'·NMe<sub>3</sub>→9'·Et<sub>2</sub>NCH=CH<sub>2</sub>)**

E= -1479.33098644275 au  
ZPE = 0.40140957 au  
G<sub>corr</sub> = 0.33843655 au  
 $\nu = -1352.02 \text{ cm}^{-1}$

P-1.7950560.313163-0.629484  
C-2.077578-1.453500-1.191212  
H-1.125349-1.877392-1.515459  
H-2.475680-2.097532-0.407490  
H-2.766005-1.478692-2.039406  
W-0.3300770.1883251.595281  
C0.658524-0.140573 3.317838  
O1.216390-0.356677 4.304230  
C0.855423-1.056031 0.469636  
O1.496467-1.705484-0.231611  
C1.0029531.700410 1.275299  
O1.7757142.557117 1.185726  
C-1.6479871.574225 2.328441  
O-2.4005522.388660 2.642556  
C-1.654916-1.3221752.099249  
O-2.401130-2.1395652.394803  
N-0.0855074.779753-0.864641  
C0.7380524.092212 -1.633641  
H1.5003984.704512 -2.106799  
H-3.1048420.539327-0.124644  
C0.7284882.724769 -1.915016  
H1.7116552.349839 -2.190208  
H0.1769382.066619 -1.249411  
H0.0362242.398955 -3.079211  
C0.1079476.220392 -0.675397  
H0.2547026.396257 0.393397

H1.0357186.494391 -1.177218  
C-1.0399747.077154-1.193595  
H-0.7880338.131863-1.071810  
H-1.2233516.887931-2.252519  
H-1.9625586.891705-0.644746  
C-1.1481434.131350-0.078526  
H-0.7782873.165901 0.255943  
H-1.3026584.742940 0.810158  
C-2.4533733.939620-0.838014  
H-3.1812273.478377-0.170477  
H-2.8626294.882390-1.201060  
H-2.3113703.260720-1.674850  
N-0.4896391.815607-4.153154  
C-0.0886290.403187-4.044624  
H0.9966200.340357 -3.976184  
H-0.530473-0.006565-3.138379  
H-0.429301-0.162394-4.916189  
C0.1196492.488638 -5.302416  
H-0.1539493.543673-5.288494  
H1.2041522.403355 -5.236667  
H-0.2163822.046001-6.244161  
C-1.9521491.964367-4.114898  
H-2.3129971.506470-3.192075  
H-2.2062813.023733-4.123196  
H-2.4109971.480065-4.982272

9'·Et<sub>2</sub>NCH=CH<sub>2</sub> E= -1479.34156833087 au  
ZPE = 0.40629933 au  
G<sub>corr</sub> = 0.34408805 au

P-1.5201350.100250-0.730898

C-1.781263-1.621753-1.434117

H-0.806035-2.088375-1.586781  
H-2.355565-2.268494-0.771221  
H-2.294739-1.585050-2.399664  
W-0.572850-0.1978291.727814  
C0.069918-0.530270 3.607419  
O0.425876-0.730701 4.686786  
C0.731268-1.564939 0.910660  
O1.452872-2.310280 0.415049  
C0.8570381.253782 1.545191  
O1.6674392.073523 1.495057  
C-1.9224261.228264 2.317756  
O-2.6811752.044261 2.607870  
C-2.027044-1.6514361.938838  
O-2.841690-2.4515982.045485  
N0.0997515.094400 -1.110059  
C0.9256554.324544 -1.851468  
H1.4956514.890634 -2.582799  
H-2.8973140.390842-0.513839  
C1.1144092.981718 -1.787594  
H1.9520112.567138 -2.333147  
H0.6597912.353645 -1.035883  
H-0.1401802.317013-3.065158  
C0.0542946.535876 -1.309004  
H0.3342947.030136 -0.372173  
H0.8194976.795431 -2.042077

C-1.3029227.057092-1.772621  
H-1.2598908.138830-1.914521  
H-1.5952336.597058-2.718850  
H-2.0817446.849437-1.038235  
C-0.6414224.534657 0.021031  
H0.0186663.851008 0.557481  
H-0.8610745.361422 0.698324  
C-1.9327363.819633-0.363272  
H-2.4708313.522605 0.536211  
H-2.5823394.467381-0.954787  
H-1.7288532.909163-0.926330  
N-0.6099981.947877-3.945017  
C-0.1760610.531048-4.092081  
H0.9089280.505402 -4.161883  
H-0.5055710.002679-3.198990  
H-0.6235580.114617-4.993204  
C-0.1201352.801886-5.052751  
H-0.4112043.831735-4.859259  
H0.9641762.732780 -5.097911  
H-0.5550892.461319-5.990373  
C-2.0837032.051210-3.762430  
H-2.3391871.467599-2.876311  
H-2.3434273.096010-3.609668  
H-2.5772051.664569-4.653197

**TS(9'·Et<sub>2</sub>NCH=CH<sub>2</sub>→5'·Et<sub>2</sub>NCH=CH<sub>2</sub>·NMe<sub>3</sub>)**

E= 1479.33085496962 au  
ZPE = 0.40149315 au  
G<sub>corr</sub> = 0.33875284 au  
ν = -1364.55 cm<sup>-1</sup>

P-1.4091010.085502-0.877561  
C-1.231531-1.566719-1.745700  
H-0.210500-1.664380-2.119631  
H-1.424926-2.417616-1.093521  
H-1.912160-1.624401-2.598592  
W0.2178430.023827 1.238033  
C1.390098-0.267059 2.852706  
O2.045690-0.461165 3.781508  
C-0.284673-1.9832551.372945  
O-0.542778-3.0938461.483667  
C1.612786-0.296932-0.223740  
O2.308012-0.397621-1.139135  
C0.8363571.963248 1.333442  
O1.2229233.045905 1.471135  
C-1.4802850.593013 2.236439  
O-2.4637450.984009 2.688595  
N-0.8028524.701967-0.489035  
C0.2075734.377685 -1.274161  
H0.8366875.222539 -1.538708  
H-2.687045-0.161312-0.307855  
C0.5424673.125000 -1.792518  
H1.5994373.046671 -2.035689  
H0.1415122.249647 -1.288882

H0.0025432.828523 -3.046832  
C-0.8980536.058597 0.060326  
H-0.7316875.987248 1.138996  
H-0.0721346.635809-0.354444  
C-2.2184706.762495-0.219775  
H-2.1682437.782956 0.163282  
H-2.4230926.807793-1.290585  
H-3.0550526.267441 0.272193  
C-1.7474423.698956 0.027068  
H-1.2224882.752567 0.124653  
H-2.0300704.013835 1.031895  
C-2.9762133.504981-0.850538  
H-3.6008422.725926-0.413573  
H-3.5678554.414951-0.945178  
H-2.6850953.166130-1.842029  
N-0.3135832.249246-4.197522  
C-1.7639172.007370-4.224807  
H-2.0269291.423473-3.340174  
H-2.2873612.962596-4.204466  
H-2.0466831.464928-5.132028  
C0.4436920.986566 -4.168761  
H1.5037141.203125 -4.046952  
H0.1018490.398836 -3.320391

H0.2907620.425008 -5.094073  
C0.1354483.147079 -5.264338  
H-0.4142344.085973-5.202451

H1.1991943.348876 -5.140495  
H-0.0306142.701753-6.249342

**5'** E= -1014.54480034475 au  
ZPE = 0.09790460 au  
G<sub>corr</sub> = 0.05302436 au

P0.005538-0.035173 0.034697  
H-0.180380-1.424941-0.123635  
H-0.3354430.339878-1.282109  
C1.8358950.081131 -0.027624  
H2.1197341.132236 -0.074233  
H2.244516-0.339950 0.890802  
H2.249303-0.446268-0.885947  
W-1.2020471.0793311.946455  
C-2.1587881.972419 3.506889

O-2.6961522.477210 4.384058  
C0.4520852.266642 2.278895  
O1.3772632.916302 2.460253  
C-1.9620852.477533 0.626959  
O-2.3728543.235778-0.124473  
C-2.850545-0.1219061.602915  
O-3.762078-0.7856531.411705  
C-0.397762-0.3647493.182230  
O0.066894-1.175112 3.844174

Et<sub>2</sub>N-CH=CH<sub>2</sub> E= -290.661558106319 au  
ZPE = 0.18170522 au  
G<sub>corr</sub> = 0.14880788 au

N0.0484360.074177 -0.361091  
C1.4113140.057172 -0.204440  
H1.8682101.026239 -0.379322  
C2.200836-0.982577 0.105802  
H3.267993-0.834766 0.170257  
H1.827168-1.980533 0.283855  
C-0.6414061.351274-0.414184  
H-0.0212142.047990-0.983221  
H-1.5629091.219427-0.987501  
C-0.9590491.945792 0.958361

H-1.4811512.900064 0.855221  
H-1.5947251.275615 1.540546  
H-0.0413862.115221 1.524350  
C-0.730395-1.121881-0.092648  
H-0.308410-1.6446630.772616  
H-1.737963-0.8142470.193746  
C-0.800794-2.064241-1.293262  
H-1.363067-2.966630-1.042087  
H-1.294078-1.576033-2.135865  
H0.198714-2.359602-1.612626

**TS(8'→5'+Et<sub>2</sub>NCH=CH<sub>2</sub>)** E= -1305.17469646197 au  
ZPE = 0.28049685 au  
G<sub>corr</sub> = 0.22344905 au  
ν = -89.70cm<sup>-1</sup>

P-0.198145-0.8856620.052141  
C0.167419-2.572390 0.735450  
H1.216779-2.610891 1.028562  
H-0.440822-2.7927851.613722  
H-0.009599-3.340362-0.018465  
W-0.0210971.0093601.817168  
C-0.0561482.392869 3.291812  
O-0.1015663.178470 4.131623  
C1.610273-0.018979 2.563328  
O2.521649-0.613561 2.921899  
C1.2983862.244544 0.861110  
O2.0532412.999627 0.416593  
C-1.5903081.857877 0.826203  
O-2.4536582.307969 0.207443  
C-1.293776-0.1948152.929332  
O-1.980452-0.8696183.547107

N-0.3596552.507865-2.445938  
C0.7451571.800997 -2.350512  
H1.5839822.328793 -1.916570  
H-1.573015-1.066231-0.253307  
C0.8900320.414453 -2.635807  
H1.9274680.123300 -2.772746  
H0.545890-0.197168-1.628428  
H0.2450030.000976 -3.404592  
C-0.3999613.897317-1.968807  
H-1.1945843.965090-1.224609  
H0.5410234.090255 -1.457883  
C-0.6220194.912316-3.082245  
H-0.5810095.918161-2.662111  
H0.1490974.829949 -3.849815  
H-1.5971744.792712-3.554987  
C-1.6068491.920524-2.957368



H-1.7030560.920937-2.535347  
H-2.4242522.510801-2.548137  
C-1.6805351.874136-4.480613

H-2.6149641.399317-4.783535  
H-1.6512062.873785-4.912254  
H-0.8571471.299155-4.903843

## References

- 1 F. Neese. ORCA – an Ab Initio, DFT and Semiempirical SCF-MO Package. D-45470 Mülheim/Ruhr: Max Planck Institute for Bioinorganic Chemistry. Version 4.2.1. Web site <http://www.cec.mpg.de/forum/portal.php> F. Neese, *WIREs Comput. Mol. Sci.* **2017**, *8*, e1327.
- 2 a) C. Lee, W. Yang and R. G. Parr, Development of the Colle-Salvetti correlation-energy formula into a functional of the electron density. *Phys. Rev. B*, **1988**, *37*, 785–789; b) A. D. Becke, Density-functional thermochemistry. III. The role of exact exchange. *J. Chem. Phys.*, **1993**, *98*, 5648–5652.
- 3 F. Weigend, R. Ahlrichs, Balanced basis sets of split valence, triple zeta valence and quadruple zeta valence quality for H to Rn: Design and assessment of accuracy. *Phys. Chem. Chem. Phys.* **2005**, *7*, 3297-3305.
- 4 A. Schäfer, C. Huber and R. Ahlrichs, Fully optimized contracted Gaussian basis sets of triple zeta valence quality for atoms Li to Kr. *J. Chem. Phys.*, **1994**, *100*, 5829–5835.
- 5 F. Neese, F. Wennmohs, A. Hansen and U. Becker, Efficient, approximate and parallel Hartree–Fock and hybrid DFT calculations. A ‘chain-of-spheres’ algorithm for the Hartree–Fock exchange. *Chem. Phys.*, **2009**, *356*, 98–109.
- 6 a) E. Caldeweyher, C. Bannwarth and S. Grimme, Extension of the D3 dispersion coefficient model. *J. Chem. Phys.*, **2017**, *147*, 34112; b) E. Caldeweyher, S. Ehlert, A. Hansen, H. Neuegebauer, S. Spicher, C. Bannwarth and S. Grimme, A generally applicable atomic-charge dependent London dispersion correction. *J. Chem. Phys.*, **2019**, *150*, 154122.
- 7 K. Ishida, K. Morokuma and A. Komornicki, The intrinsic reaction coordinate. An ab initio calculation for  $\text{HNC} \rightarrow \text{HCN}$  and  $\text{H}^- + \text{CH}_4 \rightarrow \text{CH}_4 + \text{H}^-$ . *J. Chem. Phys.*, **1977**, *66*(5), 2153-2156.
- 8 C. Riplinger, B. Sandhoefer, A. Hansen, F. Neese, Natural triple excitations in local coupled cluster calculations with pair natural orbitals. *J. Chem. Phys.* **2013**, *139*, 134101.
- 9 J. A. Pople, M. Head-Gordon, K. Raghavachari, Quadratic configuration interaction. A general technique for determining electron correlation energies. *J. Chem. Phys.* **1987**, *87*, 5968.
- 10 a) V. Barone, M. Cossi, Quantum calculation of molecular energies and energy gradients in solution by a conductor solvent model. *J. Phys. Chem. A*, **1998**, *102*, 1995-2001; b) M. Cossi, N. Rega, G. Scalmani, V. Barone, Energies, structures, and electronic properties of molecules in solution with the C-PCM solvation model. *J. Comp. Chem.*, **2003**, *24*, 669-81.
- 11 T. Ziegler, G. Schreckenbach, Calculation of NMR shielding tensors using gauge-including atomic orbitals and modern density functional theory. *J. Phys. Chem.* **1995**, *99*, 606–611.
- 12 A. Gese, S. Kermanshajian, G. Schnakenburg, Z. Kelemen, L. Nyulaszi, A. Espinosa Ferao, R. Streubel “Towards a 1,4-diphosphinine-based molecular CPS-ternary compound”, *Inorg. Chem.*, **2021**, *60*(17), 13029-13040.
